# Supplementary material for: Numerical modeling of flow and transport in the Bari industrial area by means of rough walled parallel plate and random walk models
Source: Copernicus journal article supplement (doi:10.5194/hess-22-5211-2018), 2018-10-11
Supplement: Supplementary file [file hess-22-5211-2018-supplement-title-page.pdf › hess-22-5211-2018-supplement-title-page.pdf]

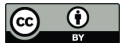

## *Supplement of*

# **Numerical modeling of flow and transport in the Bari industrial area by means of rough walled parallel plate and random walk models**

**Claudia Cherubini et al.**

*Correspondence to:* Claudia Cherubini ([claudia.cherubini@unife.it](mailto:claudia.cherubini@unife.it)) and Nicola Pastore ([nicola.pastore@poliba.it](mailto:nicola.pastore@poliba.it))

- [hess-22-5211-2018-supplement-title-page.pdf](#)
- [Hydraulic\\_head.txt](#)
- [Trasmissivity.txt](#)
- [pce\\_data.txt](#)

The copyright of individual parts of the supplement might differ from the CC BY 4.0 License.
